# Supplementary material for: Caffeine blocks SREBP2-induced hepatic PCSK9 expression to enhance LDLR-mediated cholesterol clearance
Source: PubMed Central journal article supplement (PMC8828868; doi:10.1038/s41467-022-28240-9), 2022-02-09
Supplement: 41467_2022_28240_MOESM1_ESM.pdf [file 41467_2022_28240_MOESM1_ESM.pdf]

## **Supplementary Information**

### **Caffeine Blocks SREBP2-Induced Hepatic PCSK9 Expression to Enhance LDLR-Mediated Cholesterol Clearance**

*Lebeau et al.*

Fig. S1

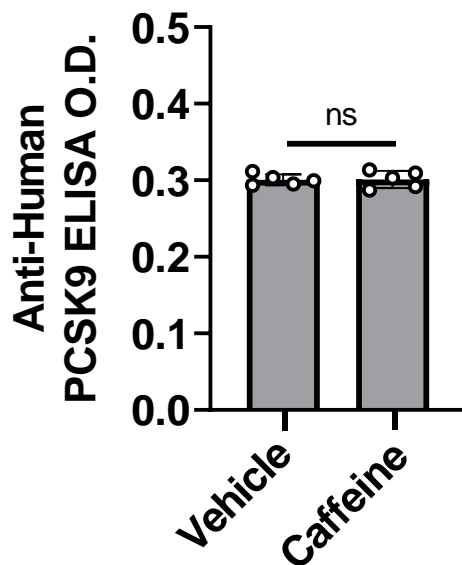

Fig. S1. Caffeine (CF) does not interfere with the anti-human PCSK9 ELISA. Recombinant PCSK9 levels were measured in the presence or absence of CF (200  $\mu$ M) added directly to the ELISA assay. (n=5 independent samples per group; data presented are mean  $\pm$  s.d. Statistical comparisons between two groups were conducted using unpaired Student's *t*-tests (ns, non-significant). Source data are provided as a Source Data file.

Fig. S2.

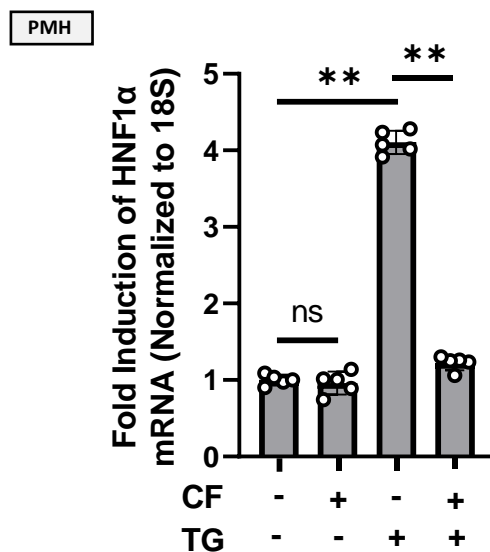

Fig. S2. Caffeine (CF) reduces HNF1 $\alpha$  expression in hepatocytes. (A) HuH7 cells were treated with an ER stress-inducing agent, thapsigargin (TG; 100 nM) in the presence or absence of CF (200  $\mu$ M) for 24 hours. HNF1 $\alpha$  expression was measured via qPCR. (n=5 biologically independent samples per group; data presented are mean  $\pm$  s.d. Statistical comparisons between multiple groups were compared using one-way ANOVAs with the Tukey HSD post-hoc test (\*,  $p < 0.05$ ; \*\*,  $p < 0.01$ ). Source data are provided as a Source Data file.

Fig. S3.

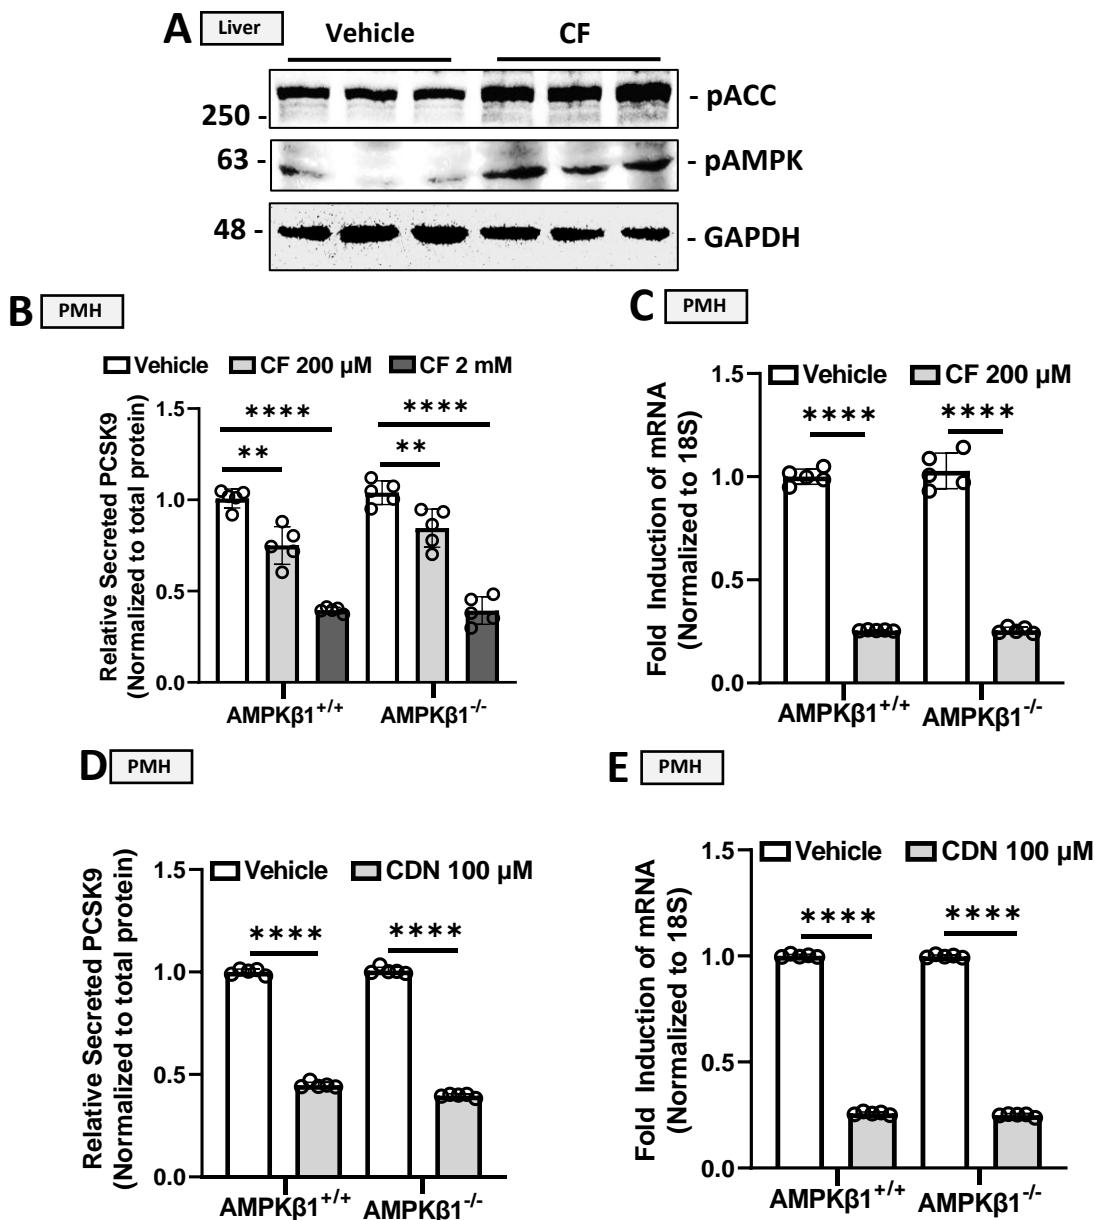

Fig. S3. Caffeine (CF) upregulates AMPK activation, but reduces PCSK9 independent of AMPK activity. (A) 12-week-old male C57BL/6J mice were fasted and treated with CF (50 mg/kg) for 8 hours prior to sacrifice (n=6). (A) The effects of CF on p-AMPK and p-ACC expression were measured via immunoblots. (B) Secreted PCSK9 levels were measured in primary mouse hepatocytes (PMH) in AMPK $\beta$ 1<sup>-/-</sup> treated with CF and compared to controls using an ELISA. (C) Relative mRNA levels of PCSK9 were measured to confirm the observations made from the ELISAs. (D) Secreted PCSK9 levels were measured in PMH in AMPK $\beta$ 1<sup>-/-</sup> treated with CDN (100  $\mu$ M) and compared to controls using a ELISAs. (E) Relative mRNA levels of PCSK9 were measured to confirm the observations made from the ELISA. Panels B-E: n=5 biologically independent samples per group; data presented are mean  $\pm$  s.d. Statistical comparisons between two groups were conducted using unpaired Student's *t*-tests (\*, *p*<0.05; \*\*, *p*<0.01; \*\*\*, *p*<0.001; \*\*\*\*, *p*<0.0001). Source data are provided as a Source Data file.

Fig. S4.

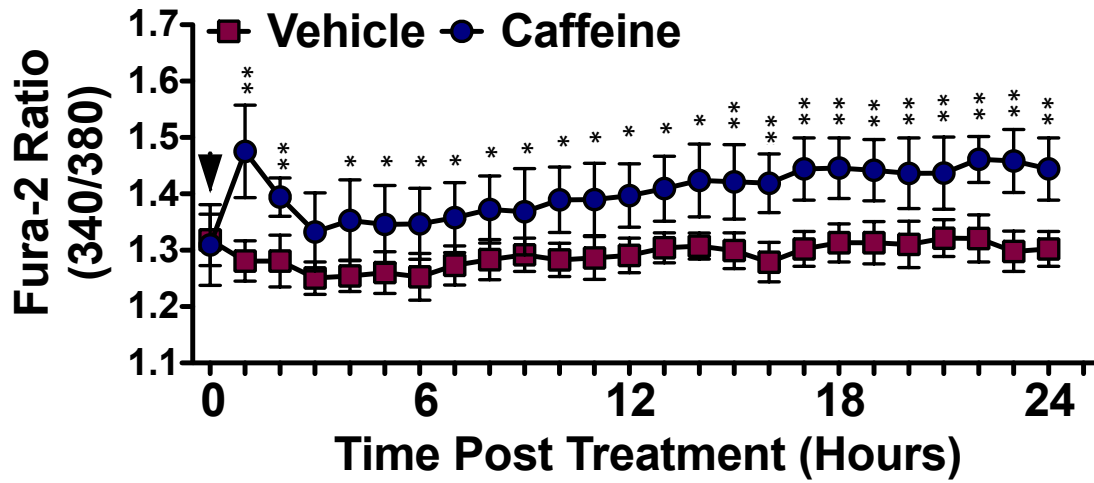

Fig. S4. Caffeine (CF) modulates endoplasmic reticulum (ER)  $\text{Ca}^{2+}$  levels. HuH7 cells were pre-treated with either CF (200  $\mu\text{M}$ ) or vehicle for 24 hours and loaded with the high-affinity  $\text{Ca}^{2+}$  dye, Fura-2-AM. Exposure of cells to a high dose of TG (1 mM) induced a spontaneous depletion of ER  $\text{Ca}^{2+}$  (n=3 biologically independent samples per group). Data presented are mean  $\pm$  s.d.; Statistical comparisons between two groups were conducted using unpaired Student's *t*-tests (\*,  $p < 0.05$ ; \*\*,  $p < 0.01$ ). Source data are provided as a Source Data file.

Fig. S5.

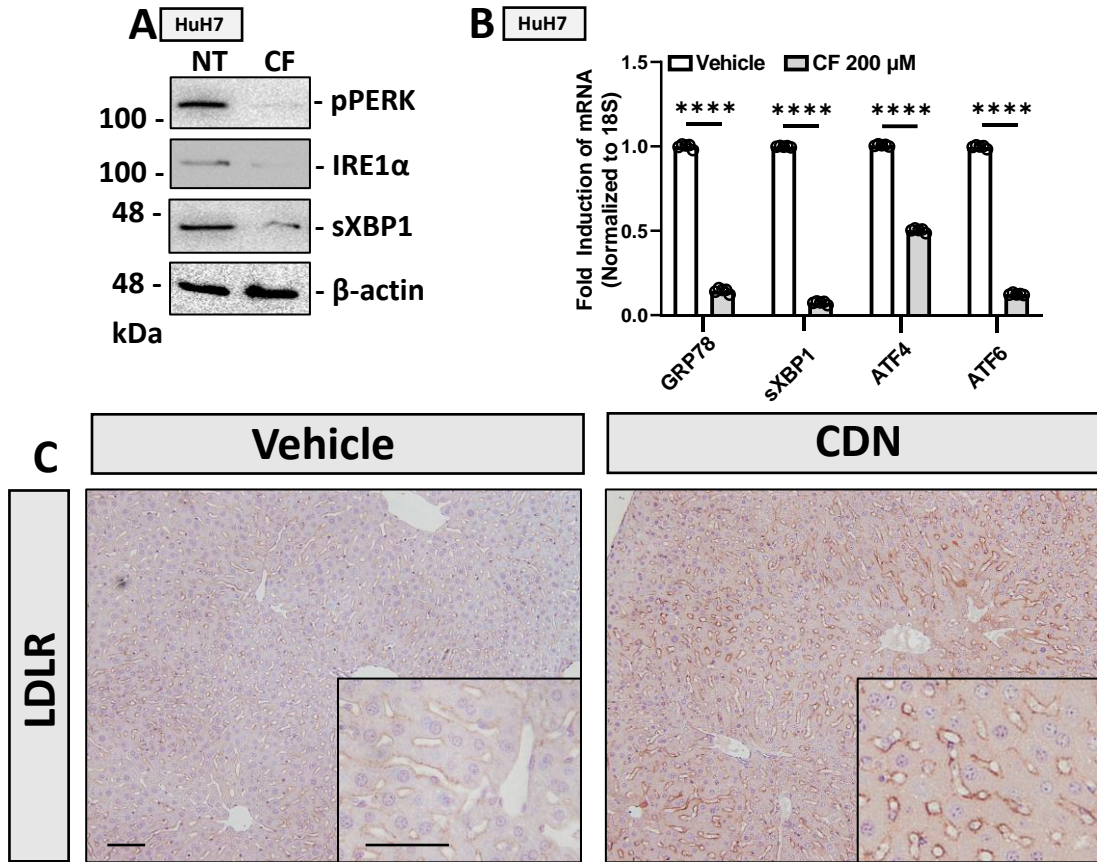

Fig. S5. CF reduces UPR activation in hepatocytes, and CDN upregulates cell-surface LDLR in mice. (A,B) HuH7 cells were treated with CF (200 μM) for 24 hours. The expression of ER stress markers (pPERK, IRE1, sXBP1, GRP78, ATF4, ATF6) were measured via (A) immunoblot and (B) real-time PCR (n=5 biologically independent samples per group; data presented are mean ± s.d.). (C) 12-week-old C57BL/6J mice were treated with CDN (50 mg/kg) for 8h and fasted prior to sacrifice (n=5). Values are presented as the mean and error bars as s.d. Statistical comparisons between two groups were conducted using unpaired Student's *t*-tests (\*,  $p < 0.05$ ; \*\*,  $p < 0.01$ ; \*\*\*,  $p < 0.001$ ; \*\*\*\*,  $p < 0.0001$ ). Scale Bars; 50 μm. Source data are provided as a Source Data file.

Fig. S6.

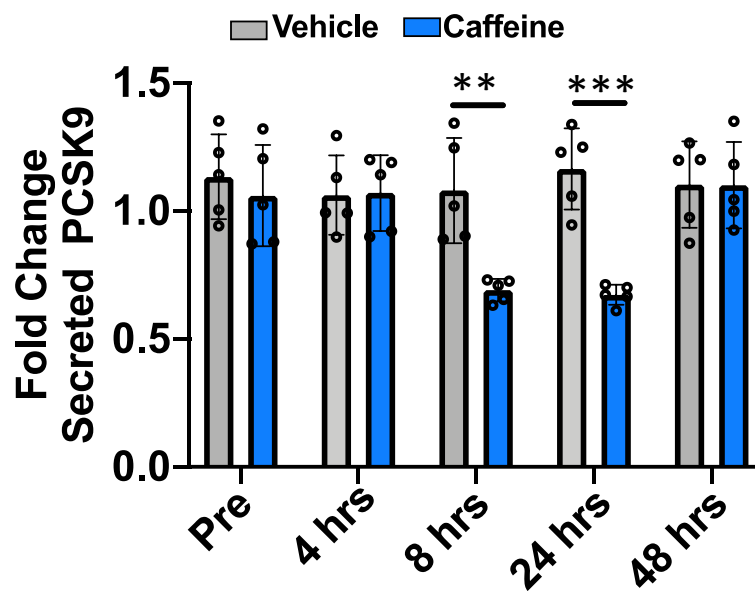

Fig. S6. Caffeine (CF) reduces plasma PCSK9 levels in mice via oral gavage. 12-week-old male C57BL/6J mice were fasted and treated with CF (20 mg/kg) of up to 48 hours prior to sacrifice (n=5). Plasma PCSK9 levels were measured at different time points using an ELISA. Values are presented as the mean and error bars as s.d. Statistical comparisons between two groups were conducted using unpaired Student's *t*-tests (\*,  $p < 0.05$ ; \*\*,  $p < 0.01$ ; \*\*\*,  $p < 0.001$ ). Source data are provided as a Source Data file.

Fig. S7.

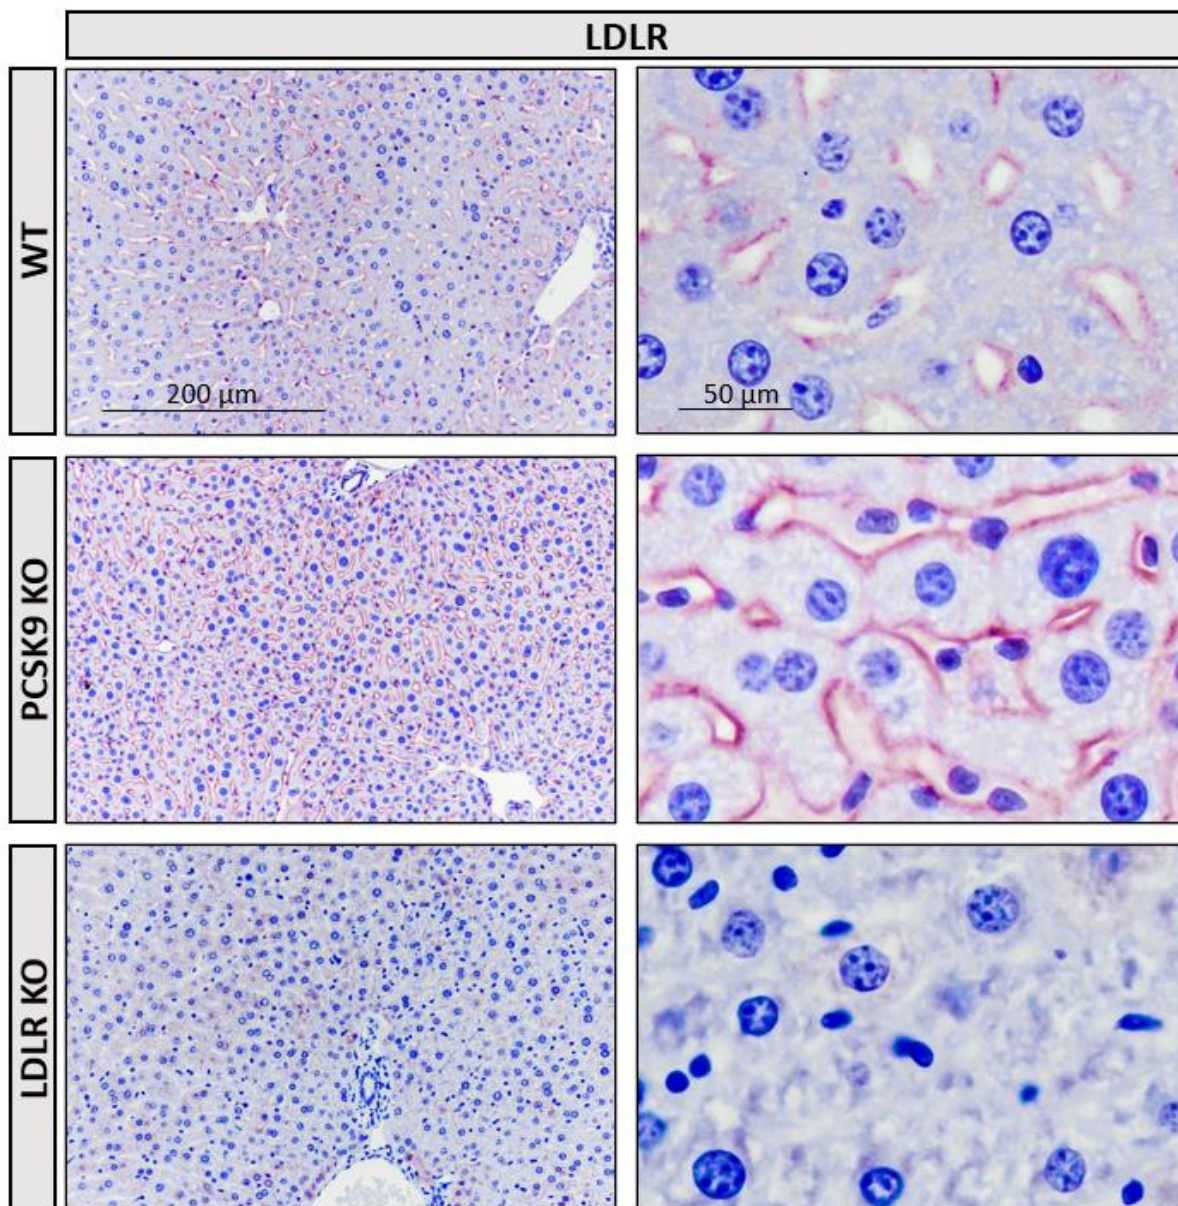

Fig. S7. 12-week-old C57BL/6J WT, LDLR knockout (KO), and PCSK9 KO mice were fasted prior to sacrifice (n=5). The livers of these mice were assessed for cell-surface expression of the LDLR via immunohistochemical staining.



**Supplementary Table 1. Compounds used during the course of these studies**

| Compound                 | Effect on ER Ca <sup>2+</sup> Levels | Concentrations used | Mechanism of Action                             |
|--------------------------|--------------------------------------|---------------------|-------------------------------------------------|
| thapsigargin (TG)        | decrease                             | 100 nM              | irreversible SERCA antagonist                   |
| CDN1163 (CDN)            | increase                             | 10 $\mu$ M          | allosteric SERCA agonist                        |
| 2 APB                    | increase                             | 100 $\mu$ M         | IP3R antagonist                                 |
| ryanodine                | decrease/increase                    | 10 nM - 10 $\mu$ M  | RyR agonist at nM and RyR antagonist at $\mu$ M |
| Caffeine (CF)            | hypothesized increase                | 10 nM – 1 mM        | multiple                                        |
| 8CC                      | hypothesized increase                | 100 nM – 1 mM       | adenosine receptor antagonist                   |
| 8CD                      | hypothesized increase                | 100 nM – 1 mM       | adenosine receptor antagonist                   |
| PSB 603                  | hypothesized increase                | 100 nM – 1 mM       | adenosine receptor antagonist                   |
| paraxanthine             | hypothesized increase                | 100 nM – 1mM        | multiple                                        |
| theophylline             | hypothesized increase                | 100 nM – 1mM        | multiple                                        |
| theobromine              | hypothesized increase                | 100 nM – 1mM        | multiple                                        |
| Cyclopiazonic acid (CPA) | decrease                             | 100 $\mu$ M         | SERCA antagonist                                |
| U18666A                  | N/A                                  | 10 $\mu$ M          | Intracellular sterol depletion                  |

**Supplementary Table 2.** Chemical structures of xanthine derivatives evaluated in the study

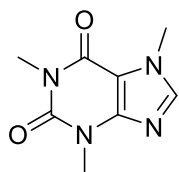

caffeine

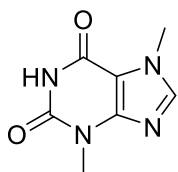

theobromine

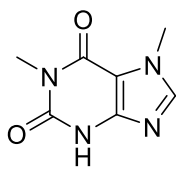

paraxanthine

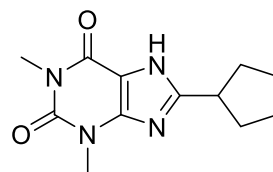

8CD  
8-cyclopentyltheophylline

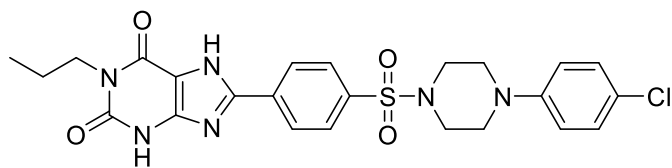

PSB603

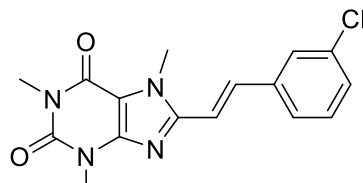

8CC  
8-(3-chlorostyryl)caffeine

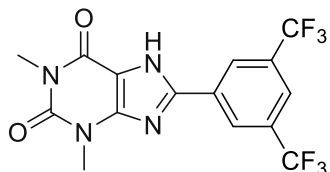

MLRA-1812

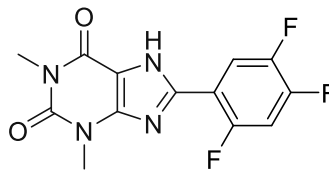

MLRA-1820

**Supplementary Table 3.** Antibodies used for immunoblotting and immunohistochemical staining. IB, immunoblot; IHC, immunohistochemistry; HIER, heat-induced epitope retrieval

| Antibody        | Catalog no.                       | Application | Dilution and Protocol |
|-----------------|-----------------------------------|-------------|-----------------------|
| <b>β-actin</b>  | A2228, Sigma-Aldrich              | IB          | 1:5000                |
| <b>CD36</b>     | NB400-144, Novus Biologicals      | IB          | 1:500                 |
| <b>PCSK9</b>    | NB300-959, Novus Biologicals      | IB          | 1:500                 |
| <b>SREBP-2</b>  | 557037, BD Biosciences            | IB          | 1:500                 |
| <b>GFP</b>      | NB600-308, Novus Biologicals      | IB          | 1:1000                |
| <b>Calnexin</b> | C5C9, Cell Signaling              | IB          | 1:1000                |
| <b>Flag</b>     | F3165, Sigma-Aldrich              | IB          | 1:1000                |
| <b>GRP78</b>    | 610979, BD Biosciences            | IB          | 1:1000                |
| <b>GRP78</b>    | SC-1050, Santa Cruz Biotechnology | IP          | 1:100                 |
| <b>GRP78</b>    | Ab21685, Abcam                    | IHC         | 1:1000 HIER           |
| <b>GRP94</b>    | ADI-SPA-850, Enzo Life Sciences   | IHC         | 1:1000, HIER          |
| <b>LDLR</b>     | AF2255, R and D Systems           | IHC         | 1:100, HIER           |
| <b>CD36</b>     | NB400-144, Novus Biologicals      | IHC         | 1:100, HIER           |

Abbreviations: IB = immunoblot; IP = immunoprecipitation; IHC = immunohistochemistry

**Supplementary Table 4.** Primers used for real-time PCR

| Gene          | Species | Forward                       | Reverse                        |
|---------------|---------|-------------------------------|--------------------------------|
| <b>GRP78</b>  | Mouse   | GTCCTGCATCATCAGCGAAAG         | GGTAGCCACATACTGAACACCA         |
| <b>GRP78</b>  | Human   | CATCACGCCGTCCTATGTCTG         | CGTCAAAGACCGTGTCTCTCG          |
| <b>SREBP1</b> | Human   | CAGGTACCGAGTTCTGGTGTGTTGGGCCA | ACTGCTAGCCGCGCTGCCGCTCGCTAG    |
| <b>SREBP1</b> | Mouse   | ACCCTGGTGAGTGAGGGACCATCTTGG   | CTTTGCTTCAGTGCCCACCACCAGGTCTTT |
| <b>SREBP2</b> | Mouse   | GCAGCAACGGGACCATTCT           | CCCCATGACTAAGTCCTTCAACT        |
| <b>SREBP2</b> | Human   | CCTGGGAGACATCGACGAGAT         | TGAATGACCGTTGCACTGAAG          |
| <b>HMGR</b>   | Mouse   | CTTTCAGAAACGAACCTGTAGCTCAC    | CTAGTGGAAGATGAATGGACATGAT      |
| <b>HMGR</b>   | Human   | TCTGGAGGATCCAAGGATTCTG        | AC CAAGTGGCTGTCTCAGTGAT        |
| <b>IRE1α</b>  | Mouse   | TGAAACACCCCTTCTTCTGG          | CCTCCTTTTCTATTGGTCACTT         |
| <b>PCSK9</b>  | Mouse   | TGCAAATCAAGGAGCATGGG          | CAGGGAGCACATTGCATCC            |
| <b>PERK</b>   | Mouse   | CCTTGGTTTCATCTAGCCTCA         | ATCCAGGGAGGGGATGAT             |
